# Supplementary material for: Body Mass Index and the Risk of Atrial Fibrillation: A Mendelian Randomization Study
Source: MDPI journal article supplement (doi:10.3390/nu14091878), 2022-04-29
Supplement: s1 [file s1]

## Supplementary material

*Article*

# Body Mass Index and the Risk of Atrial Fibrillation: A Mendelian Randomization Study

Mi Ma <sup>1</sup>, Hong Zhi <sup>2</sup>, Sheng-Yi Yang<sup>1</sup>, Evan Yi-Wen Yu<sup>1,3</sup> and Li-Na Wang <sup>1,\*</sup>

<sup>1</sup> Key Laboratory of Environmental Medicine Engineering, Ministry of Education, Department of Epidemiology & Biostatistics, School of Public Health, Southeast University, Nanjing, China.

<sup>2</sup> Department of Cardiology, ZhongDa Hospital, Southeast University, Nanjing, China.

<sup>3</sup> CAPHRI Care and Public Health Research Institute, School of Nutrition and Translational Research in Metabolism, Maastricht University, Maastricht, the Netherlands.

\* Correspondence: lnwang@seu.edu.cn

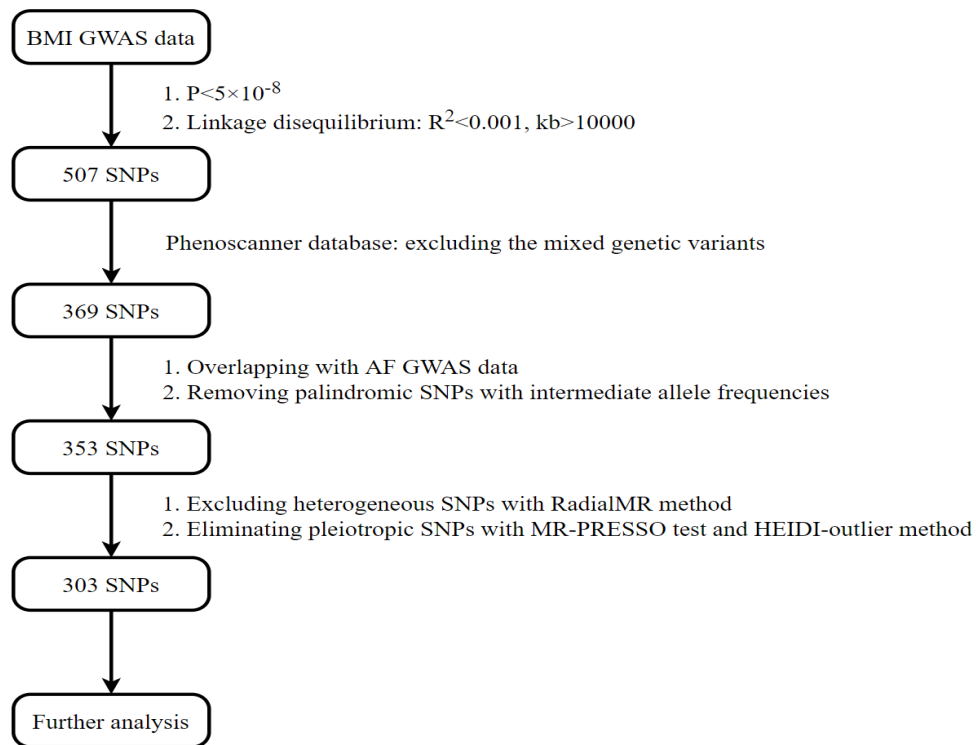

**Figure S1.** Flow chart for quality control of the instrumental variables for MR analysis

**Table S1.** Characteristics of the SNPs associated with BMI and with AF

| SNP        | Chr | Pos       | EA | Association with BMI |         |        |          | Association with AF |         |        |        |
|------------|-----|-----------|----|----------------------|---------|--------|----------|---------------------|---------|--------|--------|
|            |     |           |    | EAF                  | Beta    | SE     | P        | EAF                 | Beta    | SE     | P      |
| rs10009336 | 4   | 44480783  | T  | 0.1638               | -0.0140 | 0.0022 | 2.20E-10 | 0.1564              | -0.0018 | 0.0090 | 0.8416 |
| rs1006896  | 3   | 88104411  | C  | 0.1061               | -0.0234 | 0.0027 | 5.50E-18 | 0.1129              | 0.0110  | 0.0108 | 0.3058 |
| rs10132280 | 14  | 25928179  | A  | 0.3017               | -0.0223 | 0.0018 | 5.60E-35 | 0.302               | -0.0122 | 0.0073 | 0.0953 |
| rs10169594 | 2   | 41637688  | C  | 0.3596               | 0.0121  | 0.0018 | 2.00E-11 | 0.3739              | 0.0073  | 0.0070 | 0.2973 |
| rs10197031 | 2   | 105454590 | C  | 0.2834               | 0.0166  | 0.0019 | 1.90E-18 | 0.2918              | 0.0191  | 0.0073 | 0.0092 |
| rs10243319 | 7   | 147674678 | C  | 0.3939               | -0.0107 | 0.0018 | 1.20E-09 | 0.3967              | 0.0016  | 0.0068 | 0.8125 |
| rs10247983 | 7   | 114590228 | A  | 0.9213               | 0.0201  | 0.0033 | 1.70E-09 | 0.8999              | 0.0017  | 0.0124 | 0.8889 |
| rs10248136 | 7   | 39077397  | T  | 0.5142               | -0.0097 | 0.0017 | 2.00E-08 | 0.5051              | -0.0016 | 0.0067 | 0.8043 |
| rs10269783 | 7   | 49616203  | A  | 0.3896               | 0.0133  | 0.0017 | 1.40E-15 | 0.3963              | -0.0028 | 0.0068 | 0.6755 |
| rs1048932  | 11  | 115044850 | A  | 0.4162               | -0.0160 | 0.0017 | 3.80E-22 | 0.4282              | -0.0045 | 0.0067 | 0.5032 |
| rs10742752 | 11  | 45438374  | C  | 0.6159               | 0.0124  | 0.0017 | 1.10E-13 | 0.6144              | 0.0075  | 0.0068 | 0.2726 |
| rs10768994 | 11  | 43936945  | C  | 0.4337               | -0.0114 | 0.0017 | 6.40E-12 | 0.4422              | 0.0017  | 0.0067 | 0.8037 |
| rs10795422 | 10  | 16759312  | G  | 0.6905               | 0.0139  | 0.0019 | 9.30E-14 | 0.6919              | -0.0076 | 0.0074 | 0.2995 |
| rs10811871 | 9   | 23200766  | G  | 0.3829               | -0.0108 | 0.0018 | 1.60E-09 | 0.388               | -0.0056 | 0.0068 | 0.4146 |
| rs10858334 | 9   | 137989785 | G  | 0.1415               | 0.0143  | 0.0026 | 2.70E-08 | 0.1427              | 0.0046  | 0.0109 | 0.6749 |
| rs10867256 | 9   | 81367391  | T  | 0.553                | -0.0118 | 0.0017 | 8.70E-12 | 0.5635              | -0.0047 | 0.0067 | 0.4820 |
| rs10914462 | 1   | 32125943  | G  | 0.4255               | -0.0112 | 0.0017 | 1.50E-10 | 0.4206              | -0.0052 | 0.0067 | 0.4398 |
| rs10920678 | 1   | 190239907 | G  | 0.5709               | -0.0155 | 0.0016 | 1.50E-21 | 0.5735              | -0.0023 | 0.0067 | 0.7331 |
| rs10938397 | 4   | 45182527  | G  | 0.4317               | 0.0324  | 0.0016 | 3.40E-86 | 0.4234              | 0.0183  | 0.0067 | 0.0066 |
| rs10942267 | 5   | 80841914  | G  | 0.3088               | -0.0156 | 0.0019 | 3.90E-17 | 0.297               | 0.0039  | 0.0073 | 0.5899 |
| rs10953740 | 7   | 113460282 | G  | 0.5534               | -0.0153 | 0.0017 | 1.00E-18 | 0.5371              | -0.0182 | 0.0067 | 0.0070 |
| rs10968114 | 9   | 27800007  | C  | 0.4681               | -0.0113 | 0.0017 | 6.10E-11 | 0.4726              | 0.0073  | 0.0067 | 0.2764 |
| rs10984756 | 9   | 122651784 | G  | 0.1048               | 0.0174  | 0.0029 | 1.10E-09 | 0.1074              | -0.0138 | 0.0109 | 0.2058 |
| rs11030618 | 11  | 29243293  | T  | 0.5679               | 0.0110  | 0.0017 | 2.40E-10 | 0.5577              | 0.0061  | 0.0067 | 0.3590 |
| rs11105839 | 12  | 91237920  | A  | 0.3799               | -0.0109 | 0.0017 | 1.10E-10 | 0.3761              | -0.0050 | 0.0069 | 0.4693 |
| rs11118308 | 1   | 219633869 | G  | 0.4703               | -0.0101 | 0.0016 | 4.80E-10 | 0.4559              | 0.0071  | 0.0067 | 0.2874 |
| rs1112613  | 13  | 53651850  | A  | 0.1762               | -0.0133 | 0.0023 | 3.40E-09 | 0.1838              | -0.0114 | 0.0086 | 0.1861 |
| rs11150911 | 18  | 73498528  | C  | 0.7191               | -0.0133 | 0.0018 | 4.70E-13 | 0.6953              | -0.0117 | 0.0073 | 0.1102 |
| rs11165643 | 1   | 96924097  | T  | 0.5828               | 0.0206  | 0.0017 | 1.40E-35 | 0.5854              | 0.0060  | 0.0067 | 0.3755 |
| rs11170468 | 12  | 39430048  | C  | 0.2326               | -0.0123 | 0.0019 | 1.90E-10 | 0.241               | -0.0040 | 0.0078 | 0.6088 |
| rs11173522 | 12  | 60953472  | A  | 0.2078               | 0.0128  | 0.0021 | 1.10E-09 | 0.2103              | 0.0083  | 0.0081 | 0.3073 |
| rs11185111 | 1   | 107962328 | A  | 0.3042               | -0.0129 | 0.0019 | 7.70E-12 | 0.3021              | -0.0074 | 0.0072 | 0.3039 |
| rs11251352 | 10  | 2585792   | G  | 0.5988               | 0.0109  | 0.0018 | 7.00E-10 | 0.6053              | -0.0018 | 0.0068 | 0.7943 |
| rs11505821 | 7   | 76818677  | T  | 0.0601               | 0.0311  | 0.0035 | 2.70E-19 | 0.0616              | 0.0135  | 0.0139 | 0.3287 |
| rs11609659 | 12  | 108296260 | C  | 0.2371               | -0.0154 | 0.0020 | 2.20E-14 | 0.2458              | -0.0087 | 0.0078 | 0.2664 |
| rs11615578 | 12  | 121714935 | T  | 0.2474               | 0.0130  | 0.0020 | 8.10E-11 | 0.2542              | -0.0025 | 0.0078 | 0.7446 |
| rs11656076 | 17  | 31464270  | A  | 0.2254               | -0.0142 | 0.0021 | 5.60E-12 | 0.2258              | -0.0135 | 0.0079 | 0.0883 |
| rs11672660 | 19  | 46180184  | T  | 0.2049               | -0.0340 | 0.0021 | 1.70E-60 | 0.2095              | -0.0021 | 0.0082 | 0.8019 |
| rs11738695 | 5   | 108699161 | A  | 0.586                | 0.0097  | 0.0017 | 2.00E-08 | 0.5843              | 0.0162  | 0.0068 | 0.0165 |
| rs11739877 | 5   | 105876806 | T  | 0.6118               | 0.0117  | 0.0018 | 6.60E-11 | 0.6131              | 0.0144  | 0.0068 | 0.0362 |
| rs11855853 | 15  | 78012618  | T  | 0.2649               | -0.0145 | 0.0020 | 2.40E-13 | 0.26                | -0.0023 | 0.0077 | 0.7643 |
| rs1187352  | 9   | 87293457  | C  | 0.6518               | 0.0119  | 0.0018 | 6.00E-11 | 0.6456              | 0.0045  | 0.0070 | 0.5171 |
| rs11951673 | 5   | 95861012  | T  | 0.3941               | -0.0123 | 0.0017 | 1.10E-13 | 0.3877              | -0.0043 | 0.0068 | 0.5231 |
| rs12033257 | 1   | 112318484 | G  | 0.3835               | -0.0146 | 0.0018 | 2.40E-15 | 0.3813              | -0.0114 | 0.0070 | 0.1036 |
| rs12041258 | 1   | 195047936 | C  | 0.2287               | -0.0146 | 0.0020 | 9.50E-13 | 0.2368              | 0.0046  | 0.0078 | 0.5614 |
| rs1218822  | 13  | 28011963  | A  | 0.6663               | 0.0168  | 0.0017 | 1.90E-22 | 0.6449              | 0.0045  | 0.0070 | 0.5187 |

|            |    |           |   |         |         |        |          |        |         |        |        |
|------------|----|-----------|---|---------|---------|--------|----------|--------|---------|--------|--------|
| rs12334877 | 8  | 67194171  | A | 0.198   | -0.0144 | 0.0022 | 7.70E-11 | 0.1981 | -0.0041 | 0.0083 | 0.6209 |
| rs12364470 | 11 | 134601012 | G | 0.1626  | 0.0178  | 0.0022 | 1.10E-15 | 0.1676 | 0.0159  | 0.0091 | 0.0798 |
| rs12416812 | 11 | 888632    | A | 0.5088  | 0.0111  | 0.0016 | 6.10E-12 | 0.5191 | -0.0022 | 0.0066 | 0.7401 |
| rs1241986  | 18 | 6873954   | A | 0.8479  | -0.0139 | 0.0024 | 1.10E-08 | 0.8259 | -0.0102 | 0.0092 | 0.2701 |
| rs12422552 | 12 | 14413931  | C | 0.2663  | -0.0134 | 0.0020 | 1.60E-11 | 0.2567 | -0.0013 | 0.0077 | 0.8637 |
| rs12546578 | 8  | 85085268  | A | 0.7246  | 0.0146  | 0.0020 | 1.00E-13 | 0.7239 | -0.0083 | 0.0076 | 0.2752 |
| rs12564992 | 1  | 174478100 | G | 0.1144  | 0.0196  | 0.0026 | 5.30E-14 | 0.1082 | 0.0050  | 0.0106 | 0.6373 |
| rs12629015 | 3  | 119618053 | G | 0.1852  | -0.0135 | 0.0023 | 2.10E-09 | 0.1761 | -0.0211 | 0.0086 | 0.0140 |
| rs1266874  | 6  | 51779638  | G | 0.3558  | 0.0140  | 0.0018 | 9.80E-15 | 0.3362 | 0.0011  | 0.0070 | 0.8781 |
| rs12675063 | 8  | 132879047 | T | 0.1131  | 0.0156  | 0.0026 | 1.30E-09 | 0.1109 | 0.0035  | 0.0104 | 0.7394 |
| rs1268065  | 6  | 126042783 | A | 0.4794  | -0.0102 | 0.0017 | 1.00E-09 | 0.4805 | -0.0160 | 0.0067 | 0.0167 |
| rs12718572 | 7  | 50573325  | T | 0.4024  | -0.0117 | 0.0018 | 3.00E-11 | 0.4022 | -0.0138 | 0.0068 | 0.0416 |
| rs12762034 | 10 | 33969931  | C | 0.07583 | 0.0240  | 0.0032 | 7.30E-14 | 0.0771 | -0.0118 | 0.0125 | 0.3476 |
| rs1285997  | 14 | 91513029  | G | 0.7153  | 0.0142  | 0.0019 | 1.20E-13 | 0.6976 | 0.0124  | 0.0073 | 0.0914 |
| rs12888545 | 14 | 88308044  | G | 0.2519  | 0.0136  | 0.0020 | 9.10E-12 | 0.258  | -0.0032 | 0.0077 | 0.6797 |
| rs12905439 | 15 | 99521883  | G | 0.3393  | -0.0118 | 0.0018 | 1.40E-10 | 0.3572 | -0.0022 | 0.0072 | 0.7607 |
| rs12922346 | 16 | 82438337  | C | 0.2657  | 0.0136  | 0.0020 | 1.00E-11 | 0.2679 | 0.0075  | 0.0076 | 0.3271 |
| rs12939549 | 17 | 78611724  | G | 0.4335  | -0.0180 | 0.0016 | 2.70E-28 | 0.4387 | -0.0058 | 0.0067 | 0.3844 |
| rs1296328  | 4  | 137083193 | C | 0.5657  | -0.0179 | 0.0018 | 4.90E-24 | 0.5568 | -0.0186 | 0.0068 | 0.0063 |
| rs13047416 | 21 | 40309436  | G | 0.3769  | -0.0154 | 0.0018 | 2.20E-17 | 0.3776 | -0.0008 | 0.0070 | 0.9075 |
| rs13069244 | 3  | 180441172 | A | 0.07747 | 0.0187  | 0.0032 | 3.00E-09 | 0.0766 | 0.0139  | 0.0130 | 0.2834 |
| rs13110266 | 4  | 162129844 | A | 0.4065  | -0.0117 | 0.0017 | 1.90E-12 | 0.4147 | -0.0143 | 0.0068 | 0.0341 |
| rs13147390 | 4  | 80712000  | C | 0.3569  | 0.0103  | 0.0018 | 1.00E-08 | 0.3594 | -0.0010 | 0.0070 | 0.8909 |
| rs13174863 | 5  | 139080745 | G | 0.1548  | 0.0192  | 0.0023 | 2.90E-16 | 0.1501 | -0.0009 | 0.0095 | 0.9249 |
| rs13191362 | 6  | 163033350 | G | 0.1198  | -0.0236 | 0.0025 | 5.90E-21 | 0.1292 | -0.0165 | 0.0101 | 0.1022 |
| rs1320903  | 3  | 131758077 | A | 0.3174  | 0.0216  | 0.0018 | 9.20E-32 | 0.3127 | 0.0007  | 0.0071 | 0.9171 |
| rs1321432  | 20 | 6614691   | C | 0.6321  | 0.0201  | 0.0018 | 3.50E-29 | 0.6287 | 0.0138  | 0.0070 | 0.0480 |
| rs13250058 | 8  | 112270826 | T | 0.6771  | 0.0112  | 0.0018 | 2.90E-10 | 0.6792 | -0.0058 | 0.0072 | 0.4200 |
| rs13263601 | 8  | 14095900  | C | 0.3478  | 0.0154  | 0.0018 | 2.20E-17 | 0.3415 | 0.0116  | 0.0070 | 0.0993 |
| rs1327259  | 6  | 51177811  | G | 0.3872  | -0.0155 | 0.0018 | 1.70E-18 | 0.3828 | -0.0064 | 0.0068 | 0.3462 |
| rs13287131 | 9  | 92119579  | C | 0.2491  | 0.0123  | 0.0020 | 6.80E-10 | 0.2581 | 0.0079  | 0.0077 | 0.3005 |
| rs1330052  | 13 | 86536006  | G | 0.3504  | 0.0132  | 0.0018 | 1.50E-13 | 0.3667 | 0.0017  | 0.0069 | 0.8107 |
| rs1365466  | 18 | 36182440  | T | 0.7406  | -0.0137 | 0.0019 | 3.30E-13 | 0.7327 | -0.0091 | 0.0076 | 0.2283 |
| rs1371108  | 2  | 81816251  | A | 0.3247  | 0.0119  | 0.0018 | 9.00E-11 | 0.3186 | 0.0060  | 0.0071 | 0.3978 |
| rs1412235  | 9  | 28410996  | C | 0.3175  | 0.0246  | 0.0017 | 6.00E-45 | 0.3177 | 0.0100  | 0.0071 | 0.1618 |
| rs1430387  | 18 | 58227112  | C | 0.4295  | -0.0114 | 0.0017 | 5.80E-11 | 0.4314 | -0.0101 | 0.0067 | 0.1309 |
| rs1431659  | 8  | 73439070  | G | 0.7344  | -0.0196 | 0.0019 | 6.00E-24 | 0.7184 | -0.0069 | 0.0075 | 0.3536 |
| rs1445652  | 2  | 155668460 | A | 0.1855  | 0.0123  | 0.0022 | 4.30E-08 | 0.1878 | 0.0182  | 0.0086 | 0.0341 |
| rs1465900  | 11 | 76473138  | C | 0.2188  | -0.0125 | 0.0020 | 4.80E-10 | 0.2186 | -0.0153 | 0.0080 | 0.0570 |
| rs1476322  | 3  | 161446055 | A | 0.569   | 0.0101  | 0.0017 | 5.00E-09 | 0.5544 | 0.0053  | 0.0066 | 0.4249 |
| rs1477199  | 16 | 53712135  | G | 0.1451  | 0.0228  | 0.0024 | 9.40E-22 | 0.1392 | 0.0220  | 0.0097 | 0.0238 |
| rs1492767  | 4  | 55221467  | T | 0.4957  | 0.0094  | 0.0016 | 1.00E-08 | 0.5184 | 0.0008  | 0.0066 | 0.8993 |
| rs1503526  | 5  | 63020706  | C | 0.4838  | 0.0140  | 0.0017 | 5.50E-17 | 0.4878 | 0.0043  | 0.0066 | 0.5177 |
| rs1522569  | 4  | 171632637 | G | 0.1819  | -0.0164 | 0.0022 | 2.90E-13 | 0.1729 | 0.0073  | 0.0087 | 0.4045 |
| rs1528435  | 2  | 181550962 | T | 0.6331  | 0.0164  | 0.0017 | 9.10E-23 | 0.6191 | 0.0126  | 0.0068 | 0.0643 |
| rs1535660  | 9  | 10371073  | C | 0.8554  | -0.0147 | 0.0025 | 5.20E-09 | 0.837  | -0.0166 | 0.0096 | 0.0823 |
| rs1538247  | 6  | 153395344 | C | 0.3181  | 0.0108  | 0.0019 | 1.00E-08 | 0.3116 | -0.0010 | 0.0072 | 0.8884 |
| rs156201   | 6  | 104847441 | C | 0.7606  | 0.0123  | 0.0020 | 5.80E-10 | 0.7216 | -0.0051 | 0.0075 | 0.5022 |
| rs1624134  | 10 | 34834482  | C | 0.4068  | 0.0101  | 0.0018 | 1.10E-08 | 0.4072 | -0.0037 | 0.0068 | 0.5810 |

|            |    |           |   |         |         |        |          |        |         |        |        |
|------------|----|-----------|---|---------|---------|--------|----------|--------|---------|--------|--------|
| rs1656377  | 3  | 158285280 | C | 0.5885  | 0.0099  | 0.0017 | 1.60E-08 | 0.5844 | 0.0125  | 0.0067 | 0.0630 |
| rs1681740  | 10 | 118564313 | C | 0.3933  | -0.0115 | 0.0018 | 1.10E-10 | 0.4049 | -0.0009 | 0.0068 | 0.8938 |
| rs16871902 | 5  | 3488462   | A | 0.4877  | 0.0125  | 0.0017 | 4.60E-13 | 0.4778 | 0.0063  | 0.0067 | 0.3520 |
| rs17014375 | 1  | 209543560 | G | 0.1348  | 0.0172  | 0.0025 | 1.10E-11 | 0.1384 | 0.0154  | 0.0096 | 0.1106 |
| rs17033117 | 3  | 35443653  | T | 0.1872  | 0.0137  | 0.0022 | 8.90E-10 | 0.1878 | 0.0079  | 0.0084 | 0.3470 |
| rs17113297 | 10 | 102395982 | T | 0.2082  | 0.0166  | 0.0021 | 2.10E-15 | 0.2103 | 0.0164  | 0.0081 | 0.0438 |
| rs17119937 | 8  | 14502274  | C | 0.06905 | 0.0212  | 0.0036 | 5.60E-09 | 0.0679 | 0.0088  | 0.0139 | 0.5250 |
| rs17203016 | 2  | 208255518 | G | 0.196   | 0.0150  | 0.0020 | 2.10E-13 | 0.2089 | 0.0206  | 0.0082 | 0.0121 |
| rs17238110 | 15 | 62150364  | G | 0.1634  | -0.0353 | 0.0050 | 2.00E-12 | 0.023  | -0.0321 | 0.0207 | 0.1216 |
| rs17311369 | 15 | 47709199  | T | 0.3278  | -0.0104 | 0.0019 | 3.10E-08 | 0.3333 | -0.0030 | 0.0071 | 0.6711 |
| rs17399237 | 2  | 35471626  | C | 0.5497  | -0.0129 | 0.0017 | 6.70E-14 | 0.5494 | -0.0065 | 0.0067 | 0.3276 |
| rs17424296 | 5  | 60838903  | A | 0.3659  | -0.0108 | 0.0018 | 2.40E-09 | 0.3648 | -0.0117 | 0.0069 | 0.0919 |
| rs17425707 | 1  | 57874879  | C | 0.1003  | 0.0167  | 0.0028 | 4.40E-09 | 0.0972 | 0.0103  | 0.0114 | 0.3628 |
| rs17446257 | 13 | 40749213  | A | 0.1292  | 0.0153  | 0.0026 | 2.90E-09 | 0.1323 | -0.0006 | 0.0100 | 0.9514 |
| rs17499593 | 2  | 172649755 | G | 0.1897  | 0.0125  | 0.0022 | 1.10E-08 | 0.202  | 0.0087  | 0.0085 | 0.3046 |
| rs175165   | 22 | 20116015  | G | 0.3941  | -0.0103 | 0.0018 | 5.20E-09 | 0.4072 | -0.0147 | 0.0068 | 0.0314 |
| rs17535749 | 3  | 10027724  | A | 0.1023  | 0.0150  | 0.0027 | 2.50E-08 | 0.1089 | 0.0138  | 0.0112 | 0.2163 |
| rs17551974 | 2  | 142293146 | A | 0.1782  | -0.0141 | 0.0022 | 1.90E-10 | 0.1903 | -0.0198 | 0.0085 | 0.0189 |
| rs17636031 | 10 | 126594078 | C | 0.2701  | 0.0160  | 0.0019 | 1.20E-17 | 0.2785 | 0.0100  | 0.0079 | 0.2098 |
| rs17663412 | 5  | 167595121 | A | 0.1139  | 0.0157  | 0.0027 | 6.10E-09 | 0.1131 | 0.0085  | 0.0105 | 0.4208 |
| rs17710386 | 18 | 63461201  | C | 0.3319  | 0.0126  | 0.0018 | 1.00E-12 | 0.3236 | 0.0070  | 0.0073 | 0.3374 |
| rs1830074  | 7  | 6718674   | C | 0.288   | 0.0115  | 0.0019 | 1.40E-09 | 0.2967 | -0.0008 | 0.0074 | 0.9137 |
| rs1836303  | 15 | 46539116  | G | 0.3873  | 0.0116  | 0.0018 | 5.30E-11 | 0.3926 | 0.0062  | 0.0068 | 0.3659 |
| rs1843328  | 12 | 17111188  | A | 0.5085  | -0.0099 | 0.0017 | 7.90E-09 | 0.5063 | -0.0050 | 0.0067 | 0.4569 |
| rs1863652  | 4  | 95991417  | A | 0.3449  | -0.0115 | 0.0018 | 1.40E-10 | 0.3477 | -0.0054 | 0.0070 | 0.4340 |
| rs1884389  | 20 | 1410582   | T | 0.4289  | -0.0103 | 0.0017 | 4.00E-09 | 0.4344 | -0.0043 | 0.0068 | 0.5258 |
| rs1885728  | 6  | 5977833   | A | 0.6787  | 0.0108  | 0.0019 | 1.00E-08 | 0.6733 | 0.0056  | 0.0073 | 0.4436 |
| rs1891216  | 1  | 7728391   | G | 0.3759  | 0.0107  | 0.0018 | 2.40E-09 | 0.3785 | -0.0060 | 0.0069 | 0.3831 |
| rs1896767  | 16 | 62838304  | A | 0.5376  | -0.0109 | 0.0017 | 2.40E-10 | 0.556  | -0.0101 | 0.0067 | 0.1323 |
| rs1927790  | 13 | 96922191  | C | 0.4109  | 0.0148  | 0.0016 | 1.80E-19 | 0.3989 | -0.0055 | 0.0067 | 0.4186 |
| rs1937683  | 10 | 53679060  | T | 0.6699  | 0.0109  | 0.0018 | 3.20E-09 | 0.6656 | 0.0109  | 0.0071 | 0.1219 |
| rs1948080  | 9  | 11852043  | G | 0.3749  | -0.0137 | 0.0018 | 1.10E-14 | 0.371  | -0.0052 | 0.0069 | 0.4488 |
| rs1982441  | 8  | 28021769  | T | 0.1381  | 0.0175  | 0.0026 | 7.00E-12 | 0.1385 | 0.0055  | 0.0097 | 0.5738 |
| rs1982725  | 19 | 30618771  | T | 0.4778  | 0.0097  | 0.0017 | 3.30E-08 | 0.4777 | 0.0021  | 0.0068 | 0.7521 |
| rs2007231  | 1  | 115266306 | T | 0.6387  | -0.0104 | 0.0018 | 5.20E-09 | 0.6339 | 0.0058  | 0.0070 | 0.4066 |
| rs200810   | 6  | 97922184  | C | 0.3716  | -0.0136 | 0.0017 | 5.50E-16 | 0.3837 | -0.0044 | 0.0068 | 0.5174 |
| rs2009416  | 5  | 92415111  | T | 0.361   | -0.0121 | 0.0018 | 1.10E-11 | 0.3577 | -0.0027 | 0.0069 | 0.6960 |
| rs2051559  | 4  | 3298800   | C | 0.1308  | 0.0176  | 0.0026 | 5.00E-12 | 0.1376 | 0.0011  | 0.0097 | 0.9070 |
| rs208015   | 17 | 46252346  | C | 0.9216  | -0.0356 | 0.0034 | 1.40E-25 | 0.9018 | -0.0169 | 0.0129 | 0.1899 |
| rs2124499  | 3  | 123093541 | C | 0.3718  | -0.0123 | 0.0017 | 3.40E-13 | 0.3792 | -0.0100 | 0.0069 | 0.1444 |
| rs2143253  | 20 | 41987392  | A | 0.1189  | -0.0188 | 0.0026 | 1.10E-12 | 0.1202 | -0.0011 | 0.0102 | 0.9106 |
| rs2162524  | 2  | 230817437 | C | 0.3321  | 0.0155  | 0.0018 | 4.10E-17 | 0.3242 | 0.0105  | 0.0071 | 0.1394 |
| rs217671   | 14 | 62360464  | G | 0.2719  | 0.0144  | 0.0019 | 1.30E-13 | 0.2612 | 0.0072  | 0.0075 | 0.3397 |
| rs2228213  | 6  | 12124855  | A | 0.3481  | -0.0139 | 0.0017 | 4.60E-16 | 0.3381 | -0.0086 | 0.0070 | 0.2174 |
| rs2246012  | 6  | 131898208 | C | 0.1628  | 0.0158  | 0.0022 | 3.10E-13 | 0.1746 | 0.0132  | 0.0087 | 0.1301 |
| rs2283093  | 7  | 126721231 | T | 0.2066  | 0.0127  | 0.0021 | 3.10E-09 | 0.2242 | 0.0076  | 0.0081 | 0.3465 |
| rs2306537  | 12 | 133423695 | G | 0.3092  | 0.0133  | 0.0019 | 8.70E-13 | 0.3269 | 0.0157  | 0.0071 | 0.0278 |
| rs2317299  | 2  | 236903093 | C | 0.5597  | -0.0106 | 0.0017 | 1.30E-09 | 0.5439 | -0.0119 | 0.0067 | 0.0777 |
| rs2357760  | 6  | 120213880 | A | 0.6754  | 0.0145  | 0.0017 | 6.80E-17 | 0.6498 | 0.0181  | 0.0070 | 0.0097 |

|           |    |           |   |        |         |        |          |        |         |        |        |
|-----------|----|-----------|---|--------|---------|--------|----------|--------|---------|--------|--------|
| rs2361988 | 16 | 398151    | C | 0.2539 | -0.0155 | 0.0020 | 5.20E-15 | 0.2414 | 0.0007  | 0.0078 | 0.9263 |
| rs2365389 | 3  | 61236462  | T | 0.4143 | -0.0174 | 0.0017 | 1.30E-25 | 0.4277 | -0.0062 | 0.0067 | 0.3581 |
| rs2367112 | 5  | 64168193  | G | 0.4919 | -0.0119 | 0.0016 | 2.30E-13 | 0.5014 | -0.0030 | 0.0066 | 0.6542 |
| rs2423668 | 20 | 12430673  | C | 0.5505 | -0.0105 | 0.0019 | 2.80E-08 | 0.546  | 0.0057  | 0.0068 | 0.4036 |
| rs2425840 | 20 | 44904838  | C | 0.4059 | 0.0119  | 0.0018 | 1.60E-11 | 0.4075 | 0.0027  | 0.0068 | 0.6916 |
| rs2429150 | 12 | 2152655   | C | 0.4164 | 0.0111  | 0.0018 | 2.70E-10 | 0.4144 | 0.0037  | 0.0068 | 0.5836 |
| rs2479958 | 13 | 111984244 | G | 0.5075 | -0.0154 | 0.0018 | 1.50E-17 | 0.5036 | -0.0012 | 0.0068 | 0.8622 |
| rs2481665 | 1  | 62594677  | C | 0.4408 | -0.0161 | 0.0016 | 7.20E-23 | 0.4465 | -0.0083 | 0.0067 | 0.2125 |
| rs2543132 | 8  | 15536311  | C | 0.8134 | 0.0146  | 0.0022 | 5.00E-11 | 0.8001 | -0.0043 | 0.0085 | 0.6180 |
| rs2605603 | 11 | 93221105  | A | 0.4887 | -0.0103 | 0.0016 | 2.50E-10 | 0.4755 | -0.0139 | 0.0067 | 0.0368 |
| rs2608703 | 12 | 41846769  | A | 0.4546 | 0.0142  | 0.0017 | 1.90E-16 | 0.4642 | 0.0044  | 0.0066 | 0.5031 |
| rs262130  | 6  | 142853486 | T | 0.1969 | 0.0127  | 0.0023 | 1.80E-08 | 0.1867 | -0.0113 | 0.0085 | 0.1841 |
| rs2693826 | 2  | 6160943   | A | 0.4421 | -0.0137 | 0.0017 | 2.00E-15 | 0.4351 | -0.0099 | 0.0067 | 0.1387 |
| rs273504  | 19 | 18215247  | G | 0.4266 | 0.0153  | 0.0018 | 4.40E-18 | 0.4234 | 0.0080  | 0.0068 | 0.2395 |
| rs2791653 | 1  | 11129848  | G | 0.7577 | -0.0141 | 0.0019 | 1.30E-13 | 0.7516 | -0.0029 | 0.0078 | 0.7121 |
| rs2832283 | 21 | 30690558  | A | 0.2208 | 0.0115  | 0.0020 | 5.80E-09 | 0.2179 | -0.0078 | 0.0082 | 0.3402 |
| rs2861683 | 2  | 67836507  | C | 0.407  | -0.0144 | 0.0017 | 1.30E-16 | 0.3976 | -0.0178 | 0.0067 | 0.0084 |
| rs287104  | 19 | 34290995  | A | 0.6604 | 0.0115  | 0.0017 | 4.40E-11 | 0.6593 | 0.0068  | 0.0071 | 0.3425 |
| rs2875762 | 6  | 124925032 | C | 0.2473 | 0.0139  | 0.0020 | 1.20E-11 | 0.2343 | 0.0182  | 0.0079 | 0.0208 |
| rs2931434 | 5  | 73159098  | T | 0.3168 | -0.0104 | 0.0018 | 1.40E-08 | 0.3219 | -0.0012 | 0.0071 | 0.8703 |
| rs2943465 | 12 | 19265921  | C | 0.9444 | 0.0248  | 0.0039 | 2.00E-10 | 0.9182 | 0.0297  | 0.0141 | 0.0349 |
| rs294704  | 5  | 152519088 | T | 0.7239 | -0.0113 | 0.0019 | 4.00E-09 | 0.7136 | -0.0015 | 0.0075 | 0.8420 |
| rs3007105 | 14 | 47367616  | T | 0.4697 | 0.0142  | 0.0017 | 1.10E-17 | 0.4077 | 0.0111  | 0.0068 | 0.0995 |
| rs33500   | 3  | 42427191  | T | 0.8082 | -0.0167 | 0.0022 | 4.30E-14 | 0.7921 | -0.0183 | 0.0085 | 0.0310 |
| rs339991  | 15 | 60913637  | G | 0.5631 | 0.0124  | 0.0018 | 1.20E-12 | 0.5746 | 0.0123  | 0.0067 | 0.0652 |
| rs349088  | 11 | 84814393  | A | 0.4976 | -0.0128 | 0.0017 | 1.80E-13 | 0.4936 | 0.0001  | 0.0066 | 0.9905 |
| rs3731695 | 2  | 203820275 | C | 0.5582 | 0.0116  | 0.0016 | 7.90E-13 | 0.5453 | 0.0041  | 0.0067 | 0.5365 |
| rs3732084 | 2  | 207174316 | C | 0.6139 | 0.0107  | 0.0018 | 1.10E-09 | 0.6084 | 0.0079  | 0.0068 | 0.2432 |
| rs3736485 | 15 | 51748610  | G | 0.5443 | -0.0134 | 0.0016 | 2.50E-16 | 0.5563 | 0.0042  | 0.0067 | 0.5271 |
| rs3749897 | 6  | 42532102  | T | 0.4172 | 0.0122  | 0.0018 | 8.40E-12 | 0.4038 | 0.0038  | 0.0067 | 0.5697 |
| rs3764835 | 2  | 159519368 | A | 0.1528 | -0.0141 | 0.0024 | 3.10E-09 | 0.1546 | -0.0002 | 0.0093 | 0.9844 |
| rs3772882 | 3  | 81808602  | A | 0.3661 | 0.0127  | 0.0018 | 6.60E-13 | 0.3853 | 0.0091  | 0.0068 | 0.1819 |
| rs3800229 | 6  | 108996963 | T | 0.7123 | 0.0175  | 0.0018 | 1.40E-22 | 0.707  | -0.0073 | 0.0073 | 0.3204 |
| rs3800637 | 7  | 137403432 | C | 0.336  | 0.0115  | 0.0018 | 5.10E-10 | 0.3391 | 0.0148  | 0.0071 | 0.0356 |
| rs3806114 | 6  | 20482335  | A | 0.6773 | -0.0113 | 0.0018 | 3.40E-10 | 0.6592 | 0.0032  | 0.0072 | 0.6575 |
| rs3806572 | 2  | 55238677  | A | 0.2788 | -0.0145 | 0.0019 | 1.60E-14 | 0.2834 | 0.0039  | 0.0074 | 0.5981 |
| rs3807645 | 7  | 77830091  | A | 0.221  | -0.0166 | 0.0021 | 2.40E-15 | 0.2209 | -0.0074 | 0.0081 | 0.3554 |
| rs380857  | 9  | 101491066 | A | 0.8878 | -0.0151 | 0.0027 | 3.60E-08 | 0.8621 | -0.0005 | 0.0103 | 0.9647 |
| rs38314   | 7  | 70067315  | A | 0.4912 | -0.0120 | 0.0017 | 4.70E-12 | 0.492  | -0.0060 | 0.0067 | 0.3656 |
| rs3844598 | 5  | 140992235 | G | 0.521  | 0.0095  | 0.0017 | 3.80E-08 | 0.5357 | -0.0070 | 0.0066 | 0.2894 |
| rs3902951 | 14 | 69789755  | G | 0.2455 | 0.0134  | 0.0020 | 7.00E-12 | 0.255  | 0.0074  | 0.0077 | 0.3410 |
| rs3904244 | 10 | 27361527  | A | 0.1377 | 0.0155  | 0.0025 | 4.30E-10 | 0.1391 | 0.0213  | 0.0094 | 0.0236 |
| rs3935648 | 17 | 79085335  | G | 0.2328 | -0.0125 | 0.0022 | 6.80E-09 | 0.2177 | -0.0186 | 0.0082 | 0.0242 |
| rs3977755 | 10 | 104420210 | T | 0.2804 | -0.0135 | 0.0019 | 5.90E-13 | 0.2639 | -0.0015 | 0.0075 | 0.8419 |
| rs4072917 | 8  | 143300279 | A | 0.4694 | 0.0115  | 0.0018 | 6.90E-11 | 0.4765 | 0.0077  | 0.0067 | 0.2531 |
| rs4307239 | 7  | 24354300  | G | 0.4578 | 0.0115  | 0.0017 | 3.90E-11 | 0.4544 | -0.0084 | 0.0067 | 0.2115 |
| rs4310573 | 11 | 97855562  | T | 0.7813 | 0.0116  | 0.0021 | 3.50E-08 | 0.7611 | 0.0003  | 0.0080 | 0.9747 |
| rs4358081 | 2  | 29100642  | C | 0.4631 | 0.0097  | 0.0017 | 1.50E-08 | 0.4707 | -0.0030 | 0.0066 | 0.6547 |
| rs4430672 | 14 | 63094407  | C | 0.8004 | -0.0127 | 0.0022 | 3.90E-09 | 0.7861 | -0.0111 | 0.0083 | 0.1818 |

|           |    |           |   |        |         |        |          |        |         |        |        |
|-----------|----|-----------|---|--------|---------|--------|----------|--------|---------|--------|--------|
| rs4482463 | 2  | 205375909 | A | 0.9213 | -0.0331 | 0.0033 | 2.80E-23 | 0.895  | -0.0124 | 0.0119 | 0.2976 |
| rs4518345 | 5  | 27185904  | A | 0.2842 | -0.0117 | 0.0019 | 1.00E-09 | 0.2837 | -0.0031 | 0.0074 | 0.6723 |
| rs4556997 | 2  | 100814858 | A | 0.1349 | 0.0197  | 0.0024 | 6.90E-17 | 0.137  | -0.0015 | 0.0096 | 0.8740 |
| rs4589691 | 2  | 144051398 | G | 0.1579 | 0.0141  | 0.0024 | 4.70E-09 | 0.152  | 0.0019  | 0.0093 | 0.8349 |
| rs4639527 | 2  | 416815    | G | 0.3012 | 0.0172  | 0.0019 | 3.30E-20 | 0.3102 | 0.0017  | 0.0073 | 0.8155 |
| rs4653017 | 1  | 33776728  | T | 0.6818 | 0.0122  | 0.0018 | 4.50E-11 | 0.6748 | 0.0051  | 0.0072 | 0.4774 |
| rs4671328 | 2  | 58935282  | G | 0.5533 | -0.0219 | 0.0017 | 2.20E-36 | 0.526  | 0.0019  | 0.0067 | 0.7795 |
| rs4722398 | 7  | 3125220   | T | 0.1336 | 0.0158  | 0.0025 | 3.60E-10 | 0.134  | 0.0028  | 0.0098 | 0.7789 |
| rs4783830 | 16 | 54255346  | A | 0.3074 | -0.0105 | 0.0019 | 2.40E-08 | 0.3055 | -0.0150 | 0.0072 | 0.0368 |
| rs4786903 | 16 | 6697104   | G | 0.7368 | 0.0125  | 0.0020 | 3.50E-10 | 0.7117 | 0.0020  | 0.0076 | 0.7939 |
| rs4800191 | 18 | 22461398  | C | 0.6369 | 0.0103  | 0.0017 | 2.50E-09 | 0.6326 | -0.0068 | 0.0070 | 0.3316 |
| rs4818225 | 21 | 42629895  | G | 0.6606 | 0.0117  | 0.0018 | 2.30E-10 | 0.6502 | 0.0104  | 0.0071 | 0.1424 |
| rs4820408 | 22 | 40604945  | G | 0.592  | -0.0151 | 0.0017 | 2.10E-19 | 0.6048 | -0.0066 | 0.0069 | 0.3344 |
| rs4858193 | 3  | 20441050  | C | 0.2779 | -0.0129 | 0.0019 | 1.60E-11 | 0.2988 | 0.0079  | 0.0074 | 0.2856 |
| rs4864201 | 4  | 130731284 | C | 0.6469 | -0.0141 | 0.0017 | 1.50E-16 | 0.6439 | -0.0138 | 0.0069 | 0.0469 |
| rs4880341 | 10 | 133992689 | T | 0.5606 | -0.0118 | 0.0017 | 1.10E-11 | 0.5763 | -0.0091 | 0.0068 | 0.1808 |
| rs4906908 | 15 | 27040082  | G | 0.5253 | 0.0103  | 0.0017 | 2.50E-09 | 0.5219 | 0.0132  | 0.0067 | 0.0471 |
| rs491711  | 11 | 28742220  | C | 0.316  | -0.0115 | 0.0019 | 1.10E-09 | 0.3115 | -0.0102 | 0.0073 | 0.1623 |
| rs4929923 | 11 | 8639200   | C | 0.6376 | 0.0181  | 0.0017 | 7.20E-27 | 0.6387 | 0.0047  | 0.0069 | 0.4919 |
| rs4936175 | 11 | 132641959 | C | 0.4445 | 0.0122  | 0.0017 | 1.40E-12 | 0.4541 | 0.0016  | 0.0067 | 0.8062 |
| rs4954638 | 2  | 137435455 | C | 0.2492 | -0.0118 | 0.0020 | 2.90E-09 | 0.2351 | -0.0042 | 0.0077 | 0.5903 |
| rs4986044 | 17 | 21261560  | T | 0.4687 | -0.0164 | 0.0016 | 3.30E-23 | 0.4533 | 0.0004  | 0.0067 | 0.9548 |
| rs538579  | 3  | 62711674  | C | 0.3228 | 0.0137  | 0.0019 | 1.30E-13 | 0.3264 | 0.0010  | 0.0071 | 0.8920 |
| rs543874  | 1  | 177889480 | G | 0.1952 | 0.0475  | 0.0020 | 1.2E-122 | 0.207  | 0.0104  | 0.0082 | 0.2052 |
| rs559231  | 18 | 39644247  | T | 0.3956 | 0.0135  | 0.0018 | 2.40E-14 | 0.3949 | -0.0017 | 0.0068 | 0.8010 |
| rs577525  | 10 | 99769388  | C | 0.5676 | 0.0166  | 0.0017 | 9.70E-22 | 0.5688 | 0.0113  | 0.0067 | 0.0916 |
| rs592483  | 11 | 69445173  | T | 0.5716 | -0.0147 | 0.0017 | 2.00E-18 | 0.5654 | -0.0131 | 0.0068 | 0.0518 |
| rs6443750 | 3  | 181329682 | C | 0.8068 | 0.0148  | 0.0021 | 3.20E-12 | 0.7872 | 0.0008  | 0.0088 | 0.9306 |
| rs6448587 | 4  | 28561990  | C | 0.1891 | -0.0167 | 0.0023 | 2.30E-13 | 0.1765 | -0.0012 | 0.0086 | 0.8860 |
| rs6512302 | 20 | 62691550  | C | 0.7511 | 0.0142  | 0.0020 | 2.10E-12 | 0.7259 | 0.0110  | 0.0085 | 0.1955 |
| rs6545714 | 2  | 59307725  | A | 0.6139 | -0.0191 | 0.0017 | 9.10E-31 | 0.6041 | -0.0009 | 0.0067 | 0.8988 |
| rs6561943 | 13 | 58356761  | T | 0.2595 | 0.0119  | 0.0019 | 4.20E-10 | 0.2637 | 0.0080  | 0.0076 | 0.2867 |
| rs657452  | 1  | 49589847  | G | 0.6216 | -0.0188 | 0.0017 | 7.20E-29 | 0.6038 | 0.0029  | 0.0068 | 0.6664 |
| rs6587552 | 1  | 151018861 | G | 0.7591 | -0.0173 | 0.0020 | 1.60E-17 | 0.738  | 0.0056  | 0.0077 | 0.4650 |
| rs6591407 | 11 | 56914157  | A | 0.1861 | -0.0118 | 0.0021 | 1.90E-08 | 0.1853 | -0.0091 | 0.0085 | 0.2850 |
| rs6593688 | 1  | 96322205  | G | 0.3733 | 0.0137  | 0.0018 | 8.60E-15 | 0.381  | 0.0062  | 0.0068 | 0.3655 |
| rs6692586 | 1  | 23299906  | G | 0.832  | -0.0192 | 0.0023 | 1.10E-16 | 0.8191 | 0.0060  | 0.0090 | 0.5070 |
| rs6764533 | 3  | 196088464 | A | 0.359  | 0.0116  | 0.0018 | 1.40E-10 | 0.3667 | 0.0041  | 0.0069 | 0.5513 |
| rs6772756 | 3  | 182312152 | G | 0.3372 | -0.0104 | 0.0019 | 4.00E-08 | 0.3349 | -0.0133 | 0.0073 | 0.0703 |
| rs6785245 | 3  | 82647990  | C | 0.3969 | 0.0132  | 0.0017 | 4.00E-14 | 0.4066 | -0.0061 | 0.0067 | 0.3686 |
| rs6804842 | 3  | 25106437  | G | 0.572  | 0.0156  | 0.0017 | 3.60E-21 | 0.5751 | 0.0173  | 0.0067 | 0.0101 |
| rs6841761 | 4  | 25423538  | T | 0.5252 | -0.0131 | 0.0016 | 6.40E-16 | 0.5323 | -0.0123 | 0.0066 | 0.0636 |
| rs685870  | 11 | 64111928  | C | 0.7035 | 0.0120  | 0.0019 | 2.40E-10 | 0.6913 | 0.0002  | 0.0072 | 0.9807 |
| rs7025938 | 9  | 103088321 | G | 0.3187 | 0.0166  | 0.0019 | 3.70E-19 | 0.3135 | 0.0174  | 0.0071 | 0.0142 |
| rs7037266 | 9  | 6942940   | A | 0.3739 | -0.0112 | 0.0018 | 3.50E-10 | 0.3553 | -0.0078 | 0.0069 | 0.2602 |
| rs705217  | 1  | 34581472  | G | 0.3652 | -0.0102 | 0.0018 | 9.30E-09 | 0.3644 | -0.0138 | 0.0076 | 0.0683 |
| rs7138803 | 12 | 50247468  | A | 0.3772 | 0.0300  | 0.0017 | 2.30E-71 | 0.375  | 0.0077  | 0.0068 | 0.2618 |
| rs7148846 | 14 | 40133821  | G | 0.1896 | 0.0124  | 0.0022 | 2.20E-08 | 0.1839 | -0.0070 | 0.0085 | 0.4089 |
| rs7172627 | 15 | 31877690  | G | 0.4719 | 0.0117  | 0.0017 | 1.10E-11 | 0.484  | -0.0010 | 0.0067 | 0.8857 |

|           |    |           |   |         |         |        |          |        |         |        |        |
|-----------|----|-----------|---|---------|---------|--------|----------|--------|---------|--------|--------|
| rs7196720 | 16 | 24534662  | C | 0.5068  | -0.0129 | 0.0017 | 7.30E-14 | 0.5234 | 0.0007  | 0.0067 | 0.9113 |
| rs7334078 | 13 | 99120484  | C | 0.2882  | -0.0121 | 0.0019 | 2.20E-10 | 0.279  | -0.0073 | 0.0074 | 0.3240 |
| rs7488867 | 12 | 103699685 | T | 0.2639  | -0.0204 | 0.0020 | 8.40E-24 | 0.2522 | -0.0016 | 0.0076 | 0.8328 |
| rs7519259 | 1  | 66434743  | A | 0.5356  | 0.0125  | 0.0017 | 3.80E-13 | 0.5313 | 0.0098  | 0.0066 | 0.1386 |
| rs7535528 | 1  | 2444414   | A | 0.3741  | -0.0152 | 0.0018 | 1.40E-16 | 0.3594 | -0.0025 | 0.0070 | 0.7169 |
| rs7550711 | 1  | 110082886 | T | 0.03058 | 0.0649  | 0.0050 | 3.20E-38 | 0.0289 | 0.0222  | 0.0203 | 0.2733 |
| rs7551507 | 1  | 74995225  | T | 0.5633  | -0.0184 | 0.0016 | 9.30E-30 | 0.5565 | -0.0025 | 0.0067 | 0.7130 |
| rs7599312 | 2  | 213413231 | A | 0.2652  | -0.0186 | 0.0019 | 6.90E-24 | 0.2749 | -0.0131 | 0.0075 | 0.0799 |
| rs7615297 | 3  | 156299313 | G | 0.1465  | -0.0149 | 0.0024 | 5.70E-10 | 0.1538 | -0.0044 | 0.0092 | 0.6309 |
| rs7637852 | 3  | 44041777  | G | 0.6951  | -0.0139 | 0.0019 | 1.70E-13 | 0.6831 | 0.0059  | 0.0073 | 0.4131 |
| rs765875  | 6  | 143185683 | T | 0.4808  | -0.0121 | 0.0017 | 3.00E-12 | 0.4849 | 0.0014  | 0.0065 | 0.8283 |
| rs7683836 | 4  | 180167906 | A | 0.5405  | -0.0114 | 0.0017 | 6.30E-11 | 0.5415 | -0.0088 | 0.0067 | 0.1897 |
| rs768840  | 14 | 73143457  | A | 0.4183  | 0.0114  | 0.0018 | 2.00E-10 | 0.4314 | 0.0034  | 0.0069 | 0.6256 |
| rs7694732 | 4  | 115124089 | G | 0.4378  | -0.0099 | 0.0017 | 8.70E-09 | 0.4275 | -0.0024 | 0.0067 | 0.7232 |
| rs7704281 | 5  | 50591460  | A | 0.04531 | 0.0271  | 0.0041 | 6.50E-11 | 0.0471 | 0.0336  | 0.0160 | 0.0352 |
| rs7715256 | 5  | 153537893 | T | 0.5781  | -0.0166 | 0.0016 | 2.20E-24 | 0.5789 | -0.0108 | 0.0067 | 0.1073 |
| rs7730004 | 5  | 43191033  | T | 0.6693  | 0.0148  | 0.0018 | 9.10E-16 | 0.6601 | 0.0152  | 0.0071 | 0.0311 |
| rs7730898 | 5  | 170459675 | A | 0.729   | 0.0168  | 0.0018 | 4.50E-20 | 0.7141 | -0.0035 | 0.0075 | 0.6409 |
| rs774246  | 7  | 26990816  | G | 0.1444  | 0.0153  | 0.0025 | 5.40E-10 | 0.141  | -0.0060 | 0.0096 | 0.5342 |
| rs7780752 | 7  | 93241640  | C | 0.36    | 0.0139  | 0.0018 | 1.00E-14 | 0.3602 | 0.0055  | 0.0070 | 0.4332 |
| rs7788008 | 7  | 112972483 | A | 0.4445  | -0.0157 | 0.0017 | 1.10E-19 | 0.4339 | 0.0033  | 0.0067 | 0.6164 |
| rs7811342 | 7  | 138794618 | C | 0.1058  | -0.0197 | 0.0029 | 1.10E-11 | 0.0991 | -0.0076 | 0.0109 | 0.4863 |
| rs7819514 | 8  | 93204442  | A | 0.3216  | -0.0107 | 0.0018 | 5.70E-09 | 0.3333 | -0.0136 | 0.0071 | 0.0548 |
| rs7826312 | 8  | 32400115  | C | 0.5879  | 0.0104  | 0.0017 | 4.90E-10 | 0.5842 | -0.0016 | 0.0067 | 0.8108 |
| rs7844647 | 8  | 34503776  | C | 0.2681  | -0.0123 | 0.0018 | 2.80E-11 | 0.2724 | -0.0027 | 0.0074 | 0.7188 |
| rs7869771 | 9  | 94180627  | C | 0.2647  | -0.0140 | 0.0019 | 4.90E-13 | 0.2679 | 0.0025  | 0.0075 | 0.7421 |
| rs7871866 | 9  | 131027982 | C | 0.1531  | 0.0187  | 0.0024 | 2.30E-14 | 0.1542 | 0.0196  | 0.0093 | 0.0346 |
| rs7899106 | 10 | 87410904  | G | 0.04777 | 0.0331  | 0.0037 | 1.00E-18 | 0.0555 | 0.0152  | 0.0150 | 0.3098 |
| rs7925214 | 11 | 130794253 | T | 0.5133  | 0.0147  | 0.0018 | 4.40E-17 | 0.5325 | 0.0118  | 0.0068 | 0.0819 |
| rs7998796 | 13 | 81020036  | G | 0.3373  | 0.0105  | 0.0018 | 1.10E-08 | 0.334  | 0.0041  | 0.0070 | 0.5590 |
| rs8027205 | 15 | 98280959  | G | 0.3967  | -0.0108 | 0.0018 | 1.40E-09 | 0.3821 | -0.0056 | 0.0069 | 0.4126 |
| rs8036040 | 15 | 36402716  | A | 0.4932  | 0.0109  | 0.0017 | 2.70E-10 | 0.4981 | -0.0025 | 0.0066 | 0.7103 |
| rs806600  | 5  | 172914939 | G | 0.475   | -0.0095 | 0.0017 | 3.30E-08 | 0.4634 | -0.0005 | 0.0067 | 0.9350 |
| rs8071182 | 17 | 55336155  | A | 0.1735  | 0.0133  | 0.0022 | 2.10E-09 | 0.1863 | -0.0025 | 0.0087 | 0.7742 |
| rs8090983 | 18 | 52586691  | G | 0.3314  | 0.0118  | 0.0018 | 2.00E-10 | 0.338  | 0.0046  | 0.0070 | 0.5122 |
| rs8097783 | 18 | 58051294  | A | 0.07554 | -0.0389 | 0.0031 | 7.20E-36 | 0.0761 | -0.0243 | 0.0123 | 0.0486 |
| rs8123881 | 20 | 15819495  | G | 0.1299  | 0.0196  | 0.0024 | 4.40E-16 | 0.1376 | 0.0117  | 0.0097 | 0.2237 |
| rs8181823 | 13 | 65477940  | C | 0.7614  | 0.0127  | 0.0020 | 4.10E-10 | 0.74   | -0.0068 | 0.0077 | 0.3816 |
| rs818524  | 1  | 85201228  | C | 0.6939  | 0.0106  | 0.0019 | 3.40E-08 | 0.693  | 0.0020  | 0.0074 | 0.7816 |
| rs825688  | 16 | 73595718  | T | 0.456   | -0.0095 | 0.0017 | 4.70E-08 | 0.4492 | -0.0032 | 0.0067 | 0.6351 |
| rs845084  | 10 | 125220036 | A | 0.2678  | 0.0140  | 0.0020 | 1.30E-12 | 0.2663 | 0.0073  | 0.0075 | 0.3274 |
| rs852056  | 20 | 17102860  | C | 0.7584  | -0.0128 | 0.0020 | 1.80E-10 | 0.7493 | -0.0098 | 0.0078 | 0.2135 |
| rs872281  | 14 | 40834177  | T | 0.1728  | -0.0151 | 0.0023 | 4.70E-11 | 0.1758 | -0.0112 | 0.0087 | 0.2005 |
| rs895330  | 19 | 4060707   | G | 0.1924  | -0.0201 | 0.0023 | 5.50E-19 | 0.1922 | -0.0071 | 0.0088 | 0.4173 |
| rs9294260 | 6  | 83433228  | A | 0.4731  | 0.0147  | 0.0016 | 1.80E-19 | 0.4745 | -0.0039 | 0.0067 | 0.5588 |
| rs930295  | 2  | 50233352  | C | 0.8417  | -0.0211 | 0.0023 | 1.00E-19 | 0.812  | -0.0079 | 0.0090 | 0.3771 |
| rs9304665 | 19 | 47602577  | A | 0.7633  | 0.0229  | 0.0020 | 2.90E-29 | 0.7481 | -0.0068 | 0.0080 | 0.3983 |
| rs9362662 | 6  | 90296588  | G | 0.5201  | -0.0112 | 0.0017 | 1.20E-10 | 0.5091 | -0.0103 | 0.0066 | 0.1190 |
| rs9367368 | 6  | 13189275  | C | 0.3033  | -0.0121 | 0.0018 | 1.00E-11 | 0.3065 | -0.0028 | 0.0072 | 0.6987 |



|           |    |           |   |         |         |        |          |        |         |        |        |
|-----------|----|-----------|---|---------|---------|--------|----------|--------|---------|--------|--------|
| rs9408882 | 9  | 118664402 | A | 0.4594  | -0.0093 | 0.0016 | 1.30E-08 | 0.4629 | 0.0085  | 0.0066 | 0.2017 |
| rs946824  | 1  | 243684019 | C | 0.859   | -0.0206 | 0.0026 | 1.10E-15 | 0.8525 | 0.0104  | 0.0101 | 0.3058 |
| rs947612  | 6  | 73738661  | A | 0.7516  | -0.0116 | 0.0020 | 5.60E-09 | 0.7334 | 0.0020  | 0.0076 | 0.7924 |
| rs9478671 | 6  | 155987825 | G | 0.2087  | 0.0120  | 0.0021 | 1.70E-08 | 0.2029 | 0.0088  | 0.0083 | 0.2869 |
| rs9538162 | 13 | 59265043  | C | 0.4138  | -0.0156 | 0.0018 | 4.80E-19 | 0.4355 | -0.0037 | 0.0067 | 0.5850 |
| rs9547153 | 13 | 85903717  | G | 0.3839  | 0.0098  | 0.0017 | 8.70E-09 | 0.3896 | -0.0025 | 0.0068 | 0.7101 |
| rs9688431 | 6  | 73922654  | C | 0.06034 | -0.0231 | 0.0035 | 2.40E-11 | 0.0583 | -0.0122 | 0.0140 | 0.3827 |
| rs9816226 | 3  | 185834499 | T | 0.8199  | 0.0323  | 0.0021 | 1.60E-52 | 0.7939 | -0.0018 | 0.0086 | 0.8373 |
| rs9845966 | 3  | 13433158  | G | 0.5479  | -0.0105 | 0.0017 | 2.50E-10 | 0.5448 | 0.0021  | 0.0066 | 0.7509 |
| rs9951619 | 18 | 56882326  | G | 0.7643  | 0.0156  | 0.0020 | 1.40E-15 | 0.7451 | 0.0010  | 0.0078 | 0.8934 |
| rs998732  | 19 | 19378671  | G | 0.1578  | -0.0171 | 0.0022 | 2.00E-14 | 0.1579 | 0.0050  | 0.0092 | 0.5875 |
| rs9989141 | 14 | 94006257  | T | 0.6387  | 0.0162  | 0.0017 | 3.60E-21 | 0.6326 | 0.0087  | 0.0069 | 0.2095 |

Abbreviations: SNP, single-nucleotide polymorphism; Chr, chromosome; Pos, position; EA, effect allele; EAF, effect allele frequency; SE, standard error; AF, atrial fibrillation.

**Table S2.**The combined effect estimators of the remaining 302 SNPs obtained by IVW after removing each SNP

| SNP        | OR   | P        | SNP        | OR   | P        | SNP       | OR   | P        |
|------------|------|----------|------------|------|----------|-----------|------|----------|
| rs10009336 | 1.43 | 3.57E-34 | rs17203016 | 1.42 | 1.54E-33 | rs4818225 | 1.42 | 7.41E-34 |
| rs1006896  | 1.43 | 1.25E-34 | rs17238110 | 1.42 | 7.94E-34 | rs4820408 | 1.42 | 5.80E-34 |
| rs10132280 | 1.42 | 1.27E-33 | rs17311369 | 1.43 | 4.05E-34 | rs4858193 | 1.43 | 1.58E-34 |
| rs10169594 | 1.42 | 5.86E-34 | rs17399237 | 1.42 | 5.73E-34 | rs4864201 | 1.42 | 1.22E-33 |
| rs10197031 | 1.42 | 2.22E-33 | rs17424296 | 1.42 | 8.20E-34 | rs4880341 | 1.42 | 7.04E-34 |
| rs10243319 | 1.43 | 2.79E-34 | rs17425707 | 1.42 | 5.21E-34 | rs4906908 | 1.42 | 9.42E-34 |
| rs10247983 | 1.43 | 3.41E-34 | rs17446257 | 1.43 | 3.11E-34 | rs491711  | 1.42 | 6.97E-34 |
| rs10248136 | 1.43 | 3.69E-34 | rs17499593 | 1.42 | 5.55E-34 | rs4929923 | 1.43 | 4.56E-34 |
| rs10269783 | 1.43 | 2.19E-34 | rs175165   | 1.42 | 1.03E-33 | rs4936175 | 1.43 | 3.52E-34 |
| rs1048932  | 1.43 | 4.60E-34 | rs17535749 | 1.42 | 5.98E-34 | rs4954638 | 1.43 | 4.32E-34 |
| rs10742752 | 1.42 | 6.18E-34 | rs17551974 | 1.42 | 1.24E-33 | rs4986044 | 1.43 | 2.41E-34 |
| rs10768994 | 1.43 | 2.65E-34 | rs17636031 | 1.42 | 7.16E-34 | rs538579  | 1.43 | 3.24E-34 |
| rs10795422 | 1.43 | 1.49E-34 | rs17663412 | 1.42 | 4.98E-34 | rs543874  | 1.43 | 6.08E-34 |
| rs10811871 | 1.42 | 5.06E-34 | rs17710386 | 1.42 | 5.56E-34 | rs559231  | 1.43 | 2.43E-34 |
| rs10858334 | 1.43 | 4.07E-34 | rs1830074  | 1.43 | 3.01E-34 | rs577525  | 1.42 | 1.12E-33 |
| rs10867256 | 1.42 | 4.75E-34 | rs1836303  | 1.42 | 5.39E-34 | rs592483  | 1.42 | 1.22E-33 |
| rs10914462 | 1.42 | 4.95E-34 | rs1843328  | 1.42 | 4.80E-34 | rs6443750 | 1.43 | 3.29E-34 |
| rs10920678 | 1.43 | 3.52E-34 | rs1863652  | 1.42 | 4.93E-34 | rs6448587 | 1.43 | 3.23E-34 |
| rs10938397 | 1.42 | 9.34E-33 | rs1884389  | 1.42 | 4.53E-34 | rs6512302 | 1.42 | 6.74E-34 |
| rs10942267 | 1.43 | 1.85E-34 | rs1885728  | 1.42 | 4.86E-34 | rs6545714 | 1.43 | 2.55E-34 |
| rs10953740 | 1.42 | 2.43E-33 | rs1891216  | 1.43 | 1.97E-34 | rs6561943 | 1.42 | 5.74E-34 |
| rs10968114 | 1.43 | 1.61E-34 | rs1896767  | 1.42 | 7.54E-34 | rs657452  | 1.43 | 1.50E-34 |
| rs10984756 | 1.43 | 1.54E-34 | rs1927790  | 1.43 | 1.42E-34 | rs6587552 | 1.43 | 1.50E-34 |
| rs11030618 | 1.42 | 5.35E-34 | rs1937683  | 1.42 | 7.42E-34 | rs6591407 | 1.42 | 5.60E-34 |
| rs11105839 | 1.42 | 4.78E-34 | rs1948080  | 1.42 | 4.95E-34 | rs6593688 | 1.42 | 5.54E-34 |
| rs11118308 | 1.43 | 1.82E-34 | rs1982441  | 1.43 | 4.36E-34 | rs6692586 | 1.43 | 1.67E-34 |
| rs1112613  | 1.42 | 6.64E-34 | rs1982725  | 1.43 | 3.83E-34 | rs6764533 | 1.43 | 4.45E-34 |
| rs11150911 | 1.42 | 8.54E-34 | rs2007231  | 1.43 | 2.08E-34 | rs6772756 | 1.42 | 8.25E-34 |
| rs11165643 | 1.43 | 5.47E-34 | rs200810   | 1.43 | 4.59E-34 | rs6785245 | 1.43 | 1.53E-34 |
| rs11170468 | 1.43 | 4.24E-34 | rs2009416  | 1.43 | 3.91E-34 | rs6804842 | 1.42 | 2.24E-33 |
| rs11173522 | 1.42 | 5.66E-34 | rs2051559  | 1.43 | 3.25E-34 | rs6841761 | 1.42 | 1.08E-33 |
| rs11185111 | 1.42 | 5.86E-34 | rs208015   | 1.42 | 8.35E-34 | rs685870  | 1.43 | 3.17E-34 |
| rs11251352 | 1.43 | 2.72E-34 | rs2124499  | 1.42 | 7.64E-34 | rs7025938 | 1.42 | 2.02E-33 |
| rs11505821 | 1.42 | 5.89E-34 | rs2143253  | 1.43 | 3.22E-34 | rs7037266 | 1.42 | 6.06E-34 |
| rs11609659 | 1.42 | 6.38E-34 | rs2162524  | 1.42 | 8.70E-34 | rs705217  | 1.42 | 7.91E-34 |
| rs11615578 | 1.43 | 2.58E-34 | rs217671   | 1.42 | 5.69E-34 | rs7138803 | 1.43 | 6.45E-34 |
| rs11656076 | 1.42 | 9.06E-34 | rs2228213  | 1.42 | 6.92E-34 | rs7148846 | 1.43 | 2.12E-34 |
| rs11672660 | 1.43 | 1.82E-34 | rs2246012  | 1.42 | 8.06E-34 | rs7172627 | 1.43 | 2.80E-34 |
| rs11738695 | 1.42 | 1.10E-33 | rs2283093  | 1.42 | 5.38E-34 | rs7196720 | 1.43 | 2.74E-34 |
| rs11739877 | 1.42 | 1.13E-33 | rs2306537  | 1.42 | 1.30E-33 | rs7334078 | 1.42 | 5.59E-34 |
| rs11855853 | 1.43 | 3.63E-34 | rs2317299  | 1.42 | 8.64E-34 | rs7488867 | 1.43 | 2.88E-34 |
| rs1187352  | 1.42 | 4.58E-34 | rs2357760  | 1.42 | 1.90E-33 | rs7519259 | 1.42 | 8.08E-34 |
| rs11951673 | 1.43 | 4.55E-34 | rs2361988  | 1.43 | 2.72E-34 | rs7535528 | 1.43 | 3.64E-34 |
| rs12033257 | 1.42 | 9.48E-34 | rs2365389  | 1.43 | 5.73E-34 | rs7550711 | 1.43 | 6.79E-34 |
| rs12041258 | 1.43 | 2.01E-34 | rs2367112  | 1.43 | 4.06E-34 | rs7551507 | 1.43 | 3.33E-34 |
| rs1218822  | 1.43 | 4.48E-34 | rs2423668  | 1.43 | 2.01E-34 | rs7599312 | 1.42 | 1.18E-33 |
| rs12334877 | 1.43 | 4.18E-34 | rs2425840  | 1.43 | 3.93E-34 | rs7615297 | 1.43 | 4.16E-34 |

|            |      |          |           |      |          |           |      |          |
|------------|------|----------|-----------|------|----------|-----------|------|----------|
| rs12364470 | 1.42 | 9.87E-34 | rs2429150 | 1.43 | 4.32E-34 | rs7637852 | 1.43 | 1.70E-34 |
| rs12416812 | 1.43 | 2.55E-34 | rs2479958 | 1.43 | 3.10E-34 | rs765875  | 1.43 | 2.59E-34 |
| rs1241986  | 1.42 | 5.85E-34 | rs2481665 | 1.42 | 7.47E-34 | rs7683836 | 1.42 | 6.87E-34 |
| rs12422552 | 1.43 | 3.41E-34 | rs2543132 | 1.43 | 2.26E-34 | rs768840  | 1.43 | 4.19E-34 |
| rs12546578 | 1.43 | 1.39E-34 | rs2605603 | 1.42 | 9.97E-34 | rs7694732 | 1.43 | 3.92E-34 |
| rs12564992 | 1.43 | 4.09E-34 | rs2608703 | 1.43 | 4.63E-34 | rs7704281 | 1.42 | 1.10E-33 |
| rs12629015 | 1.42 | 1.25E-33 | rs262130  | 1.43 | 1.59E-34 | rs7715256 | 1.42 | 1.05E-33 |
| rs1266874  | 1.43 | 3.23E-34 | rs2693826 | 1.42 | 8.39E-34 | rs7730004 | 1.42 | 1.38E-33 |
| rs12675063 | 1.43 | 3.87E-34 | rs273504  | 1.42 | 6.94E-34 | rs7730898 | 1.43 | 1.86E-34 |
| rs1268065  | 1.42 | 1.17E-33 | rs2791653 | 1.43 | 3.85E-34 | rs774246  | 1.43 | 2.22E-34 |
| rs12718572 | 1.42 | 1.07E-33 | rs2832283 | 1.43 | 2.04E-34 | rs7780752 | 1.42 | 5.06E-34 |
| rs12762034 | 1.43 | 1.54E-34 | rs2861683 | 1.42 | 2.11E-33 | rs7788008 | 1.43 | 1.74E-34 |
| rs1285997  | 1.42 | 9.50E-34 | rs287104  | 1.42 | 5.48E-34 | rs7811342 | 1.42 | 4.75E-34 |
| rs12888545 | 1.43 | 2.35E-34 | rs2875762 | 1.42 | 1.29E-33 | rs7819514 | 1.42 | 9.01E-34 |
| rs12905439 | 1.43 | 3.75E-34 | rs2931434 | 1.43 | 3.55E-34 | rs7826312 | 1.43 | 2.80E-34 |
| rs12922346 | 1.42 | 5.71E-34 | rs2943465 | 1.42 | 1.14E-33 | rs7844647 | 1.43 | 3.88E-34 |
| rs12939549 | 1.43 | 5.41E-34 | rs294704  | 1.43 | 3.59E-34 | rs7869771 | 1.43 | 2.39E-34 |
| rs1296328  | 1.42 | 3.10E-33 | rs3007105 | 1.42 | 9.51E-34 | rs7871866 | 1.42 | 1.30E-33 |
| rs13047416 | 1.43 | 3.00E-34 | rs33500   | 1.42 | 1.31E-33 | rs7899106 | 1.42 | 6.07E-34 |
| rs13069244 | 1.42 | 5.65E-34 | rs339991  | 1.42 | 1.00E-33 | rs7925214 | 1.42 | 1.05E-33 |
| rs13110266 | 1.42 | 1.12E-33 | rs349088  | 1.43 | 2.90E-34 | rs7998796 | 1.42 | 4.42E-34 |
| rs13147390 | 1.43 | 3.01E-34 | rs3731695 | 1.43 | 4.49E-34 | rs8027205 | 1.42 | 5.01E-34 |
| rs13174863 | 1.43 | 2.68E-34 | rs3732084 | 1.42 | 6.11E-34 | rs8036040 | 1.43 | 2.50E-34 |
| rs13191362 | 1.42 | 1.03E-33 | rs3736485 | 1.43 | 1.84E-34 | rs806600  | 1.43 | 3.40E-34 |
| rs1320903  | 1.43 | 2.30E-34 | rs3749897 | 1.43 | 4.36E-34 | rs8071182 | 1.43 | 2.74E-34 |
| rs1321432  | 1.42 | 1.66E-33 | rs3764835 | 1.43 | 3.26E-34 | rs8090983 | 1.42 | 4.62E-34 |
| rs13250058 | 1.43 | 2.04E-34 | rs3772882 | 1.42 | 7.27E-34 | rs8097783 | 1.42 | 1.83E-33 |
| rs13263601 | 1.42 | 1.00E-33 | rs3800229 | 1.43 | 1.09E-34 | rs8123881 | 1.42 | 6.85E-34 |
| rs1327259  | 1.42 | 5.76E-34 | rs3800637 | 1.42 | 1.05E-33 | rs8181823 | 1.43 | 1.86E-34 |
| rs13287131 | 1.42 | 5.68E-34 | rs3806114 | 1.43 | 2.48E-34 | rs818524  | 1.43 | 3.75E-34 |
| rs1330052  | 1.43 | 3.49E-34 | rs3806572 | 1.43 | 2.02E-34 | rs825688  | 1.43 | 4.17E-34 |
| rs1365466  | 1.42 | 6.54E-34 | rs3807645 | 1.42 | 5.56E-34 | rs845084  | 1.42 | 5.71E-34 |
| rs1371108  | 1.42 | 5.16E-34 | rs380857  | 1.43 | 3.33E-34 | rs852056  | 1.42 | 6.55E-34 |
| rs1412235  | 1.42 | 9.93E-34 | rs38314   | 1.42 | 5.38E-34 | rs872281  | 1.42 | 6.82E-34 |
| rs1430387  | 1.42 | 7.73E-34 | rs3844598 | 1.43 | 1.89E-34 | rs895330  | 1.43 | 5.16E-34 |
| rs1431659  | 1.43 | 5.70E-34 | rs3902951 | 1.42 | 5.58E-34 | rs9294260 | 1.43 | 1.73E-34 |
| rs1445652  | 1.42 | 9.60E-34 | rs3904244 | 1.42 | 1.18E-33 | rs930295  | 1.42 | 5.48E-34 |
| rs1465900  | 1.42 | 9.24E-34 | rs3935648 | 1.42 | 1.10E-33 | rs9304665 | 1.43 | 9.20E-35 |
| rs1476322  | 1.42 | 4.97E-34 | rs3977755 | 1.43 | 3.45E-34 | rs9362662 | 1.42 | 7.97E-34 |
| rs1477199  | 1.42 | 1.75E-33 | rs4072917 | 1.42 | 6.24E-34 | rs9367368 | 1.43 | 3.93E-34 |
| rs1492767  | 1.43 | 3.48E-34 | rs4307239 | 1.43 | 1.43E-34 | rs9408882 | 1.43 | 1.71E-34 |
| rs1503526  | 1.43 | 4.58E-34 | rs4310573 | 1.43 | 3.32E-34 | rs946824  | 1.43 | 1.35E-34 |
| rs1522569  | 1.43 | 1.69E-34 | rs4358081 | 1.43 | 2.56E-34 | rs947612  | 1.43 | 2.78E-34 |
| rs1528435  | 1.42 | 1.27E-33 | rs4430672 | 1.42 | 6.65E-34 | rs9478671 | 1.42 | 5.63E-34 |
| rs1535660  | 1.42 | 8.24E-34 | rs4482463 | 1.42 | 6.42E-34 | rs9538162 | 1.43 | 4.18E-34 |
| rs1538247  | 1.43 | 3.00E-34 | rs4518345 | 1.43 | 4.02E-34 | rs9547153 | 1.43 | 2.70E-34 |
| rs156201   | 1.43 | 2.11E-34 | rs4556997 | 1.43 | 2.54E-34 | rs9688431 | 1.42 | 5.23E-34 |
| rs1624134  | 1.43 | 2.42E-34 | rs4589691 | 1.43 | 3.59E-34 | rs9816226 | 1.43 | 1.14E-34 |
| rs1656377  | 1.42 | 8.65E-34 | rs4639527 | 1.43 | 3.18E-34 | rs9845966 | 1.43 | 2.65E-34 |

|            |      |          |           |      |          |           |      |          |
|------------|------|----------|-----------|------|----------|-----------|------|----------|
| rs1681740  | 1.43 | 3.36E-34 | rs4653017 | 1.42 | 4.76E-34 | rs9951619 | 1.43 | 3.17E-34 |
| rs16871902 | 1.42 | 5.58E-34 | rs4671328 | 1.43 | 1.35E-34 | rs998732  | 1.43 | 2.08E-34 |
| rs17014375 | 1.42 | 8.46E-34 | rs4722398 | 1.43 | 3.72E-34 | rs9989141 | 1.42 | 7.55E-34 |
| rs17033117 | 1.42 | 5.44E-34 | rs4783830 | 1.42 | 9.59E-34 | IVW       | 1.43 | 3.72E-34 |
| rs17113297 | 1.42 | 1.25E-33 | rs4786903 | 1.43 | 3.66E-34 |           |      |          |
| rs17119937 | 1.42 | 4.53E-34 | rs4800191 | 1.43 | 1.95E-34 |           |      |          |

Abbreviations: SNP, single-nucleotide polymorphism; OR, odds ratio; IVW, inverse variance weighted.
